# Supplementary material for: Targeting the Granulocytic Defense against A. fumigatus in Healthy Volunteers and Septic Patients
Source: MDPI journal article supplement (doi:10.3390/ijms24129911), 2023-06-08
Supplement: s1 [file s1]

## Supplementary Material

(a)

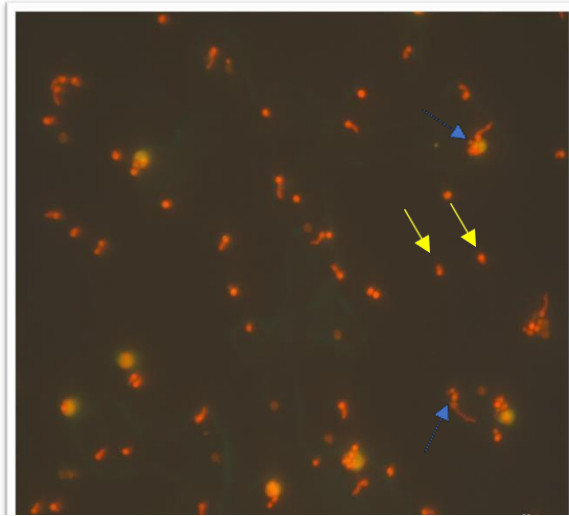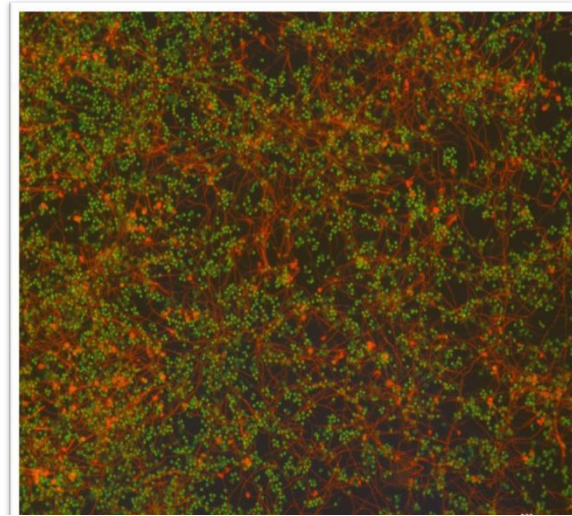

(b)

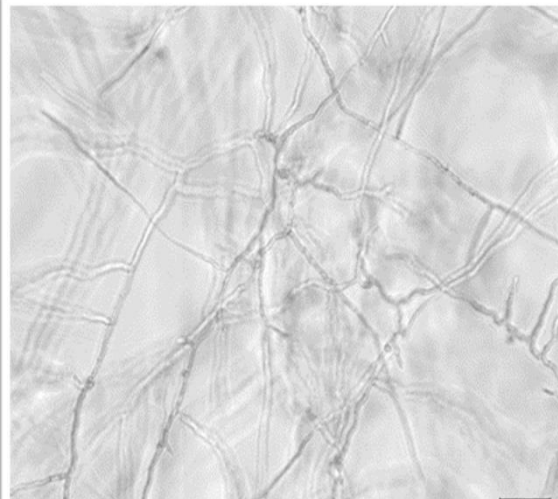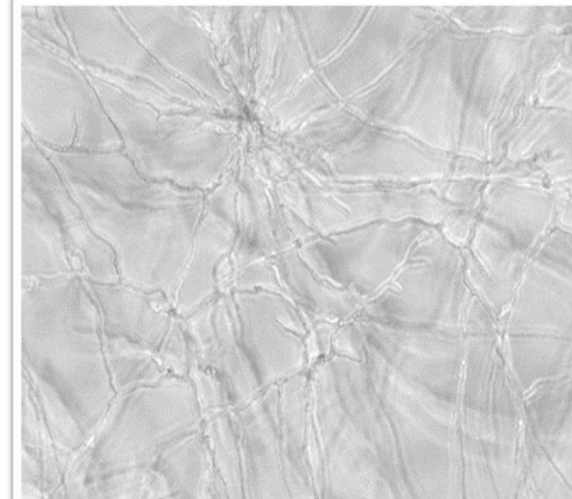

(c)

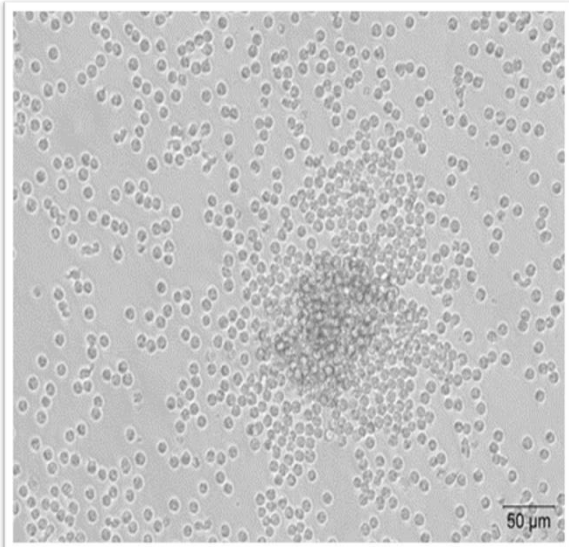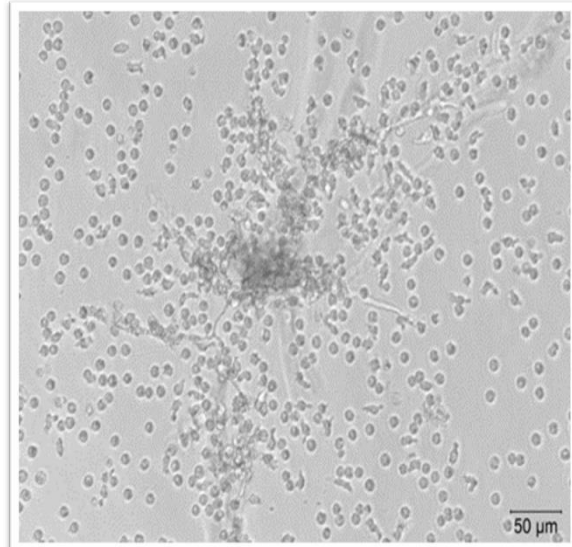

**Figure S1.** (a) Native microscopy of co-culture with NGs from a healthy participant with calcofluor staining. Left: 40× magnification of  $1 \times 10^6$  *Aspergillus* conidia incubated with  $1 \times 10^5$  NGs (E/T ratio 10:1) for 6 h. NGs are stained green-orange and conidia are stained bright orange due to calcofluor staining. Conidia started swelling and changed from round to club-shaped (“germ tubes”, yellow arrows). A few conidia started germinating to hyphae (blue arrows). Right: 10× magnification of co-culture of  $1 \times 10^6$  *Aspergillus* conidia with  $2 \times 10^5$  NGs (E/T ratio 5:1) for 23 h. Acridine orange stains of RNA (orange) and DNA (green). Green fluorescence was observed in non-vital NGs (DNA) and red fluorescence in vital hyphae and mycelium (RNA). (b) Native microscopy (20× magnification) of *A. fumigatus* only (control) and co-culture of *A. fumigatus* with NGs from one healthy participant after 16 h co-incubation. Left: Control revealed tight mycelium; right: another control with double amount of *A. fumigatus* conidia at the beginning shows even tighter mycelium. (c) Left: E/T ratio of 1280:1 with the same amount of *A. fumigatus* as in (a) resulted in almost no *Aspergillus* growth. Right: E/T ratio of 640:1 with the same amount of *A. fumigatus* conidia at the beginning as in (b). Some mycelium growth can be seen because of insufficient NG inhibition. NG, neutrophil granulocyte; DNA, deoxyribonucleic acid; RNA, ribonucleic acid.
